# Supplementary material for: Interfacial electron transfer in heterojunction nanofibers for highly efficient oxygen evolution reaction
Source: Royal Society of Chemistry journal article supplement (doi:10.1039/d2nr05000e), 2022-11-28
Supplement: d2nr05000e1.pdf [file d2nr05000e1.pdf]

*Supporting Information for*

**Interfacial electron transfer in heterojunction nanofibers for highly efficient oxygen evolution reaction**

Lei Fu,<sup>a</sup> Jun Zhou,<sup>\*a</sup> Qinyuan Deng,<sup>a</sup> Jiaming Yang,<sup>a</sup> Qinghao Li,<sup>a</sup> Zihe Zhu,<sup>a</sup> and Kai Wu<sup>a</sup>

<sup>a</sup>*Center of Nanomaterials for Renewable Energy, State Key Laboratory of Electrical Insulation and Power*

*Equipment, Xi'an Jiaotong University, Xi'an 710049, People's Republic of China*

\*Email: zhoujun@mail.xjtu.edu.cn

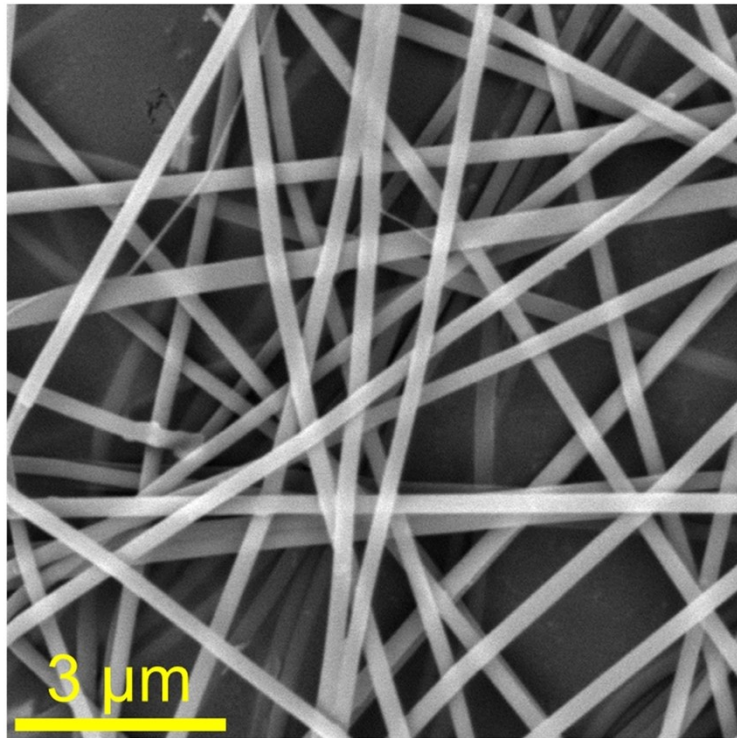

**Figure S1.** SEM image of precursor SCF nanofibers synthesized by the electrospinning method before calcination.

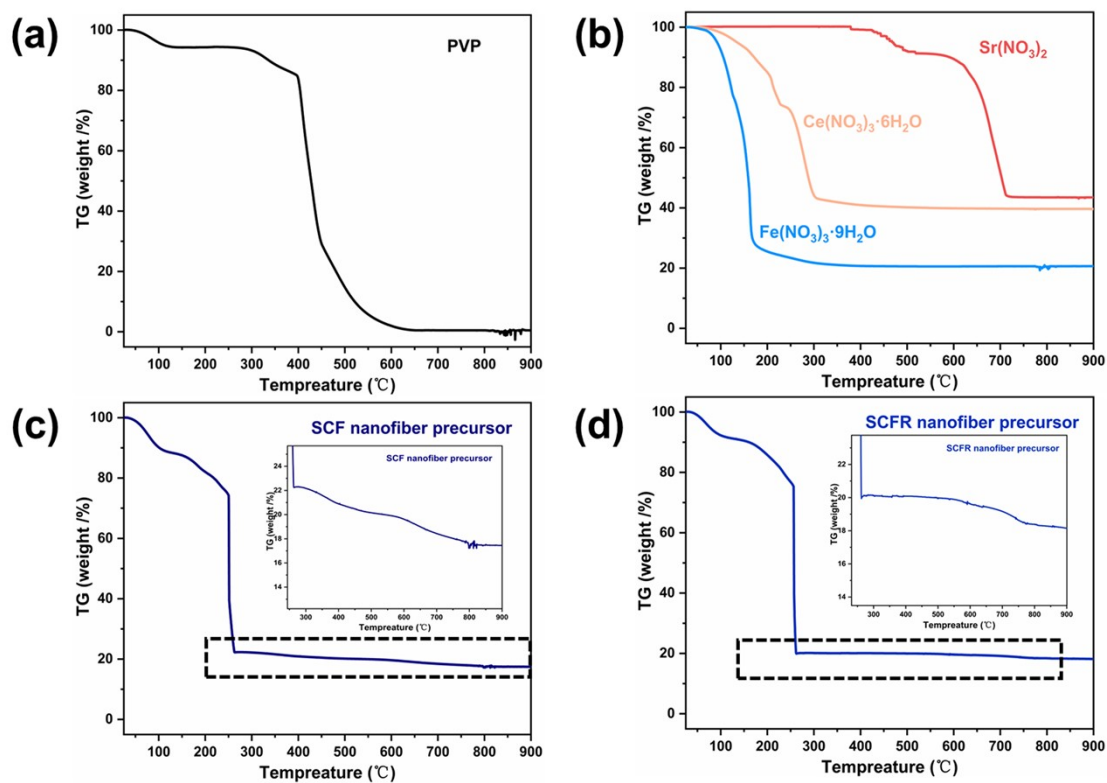

**Figure S2.** TGA analysis of (a) PVP, (b) Sr(NO<sub>3</sub>)<sub>2</sub>, Ce(NO<sub>3</sub>)<sub>3</sub>·6H<sub>2</sub>O, and Fe(NO<sub>3</sub>)<sub>3</sub>·9H<sub>2</sub>O, (c) SCF nanofiber precursor, and (d) SCFR nanofiber precursor. Data were collected under air atmosphere using a temperature ramp rate of 10 °C min<sup>-1</sup>.

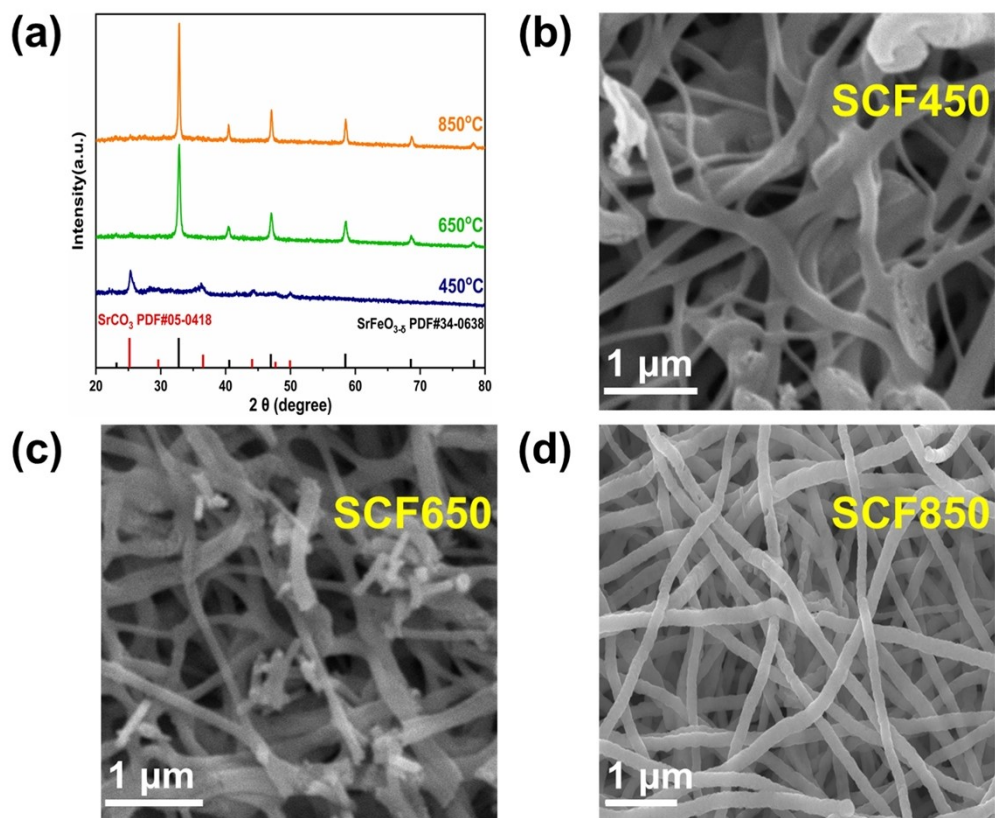

**Figure S3.** (a) XRD patterns of SCF nanofiber at different calcination temperatures. (b-d) SEM images of SCF nanofibers at different calcination temperatures of (b) 450 °C, (c) 650 °C, and (d) 850 °C.

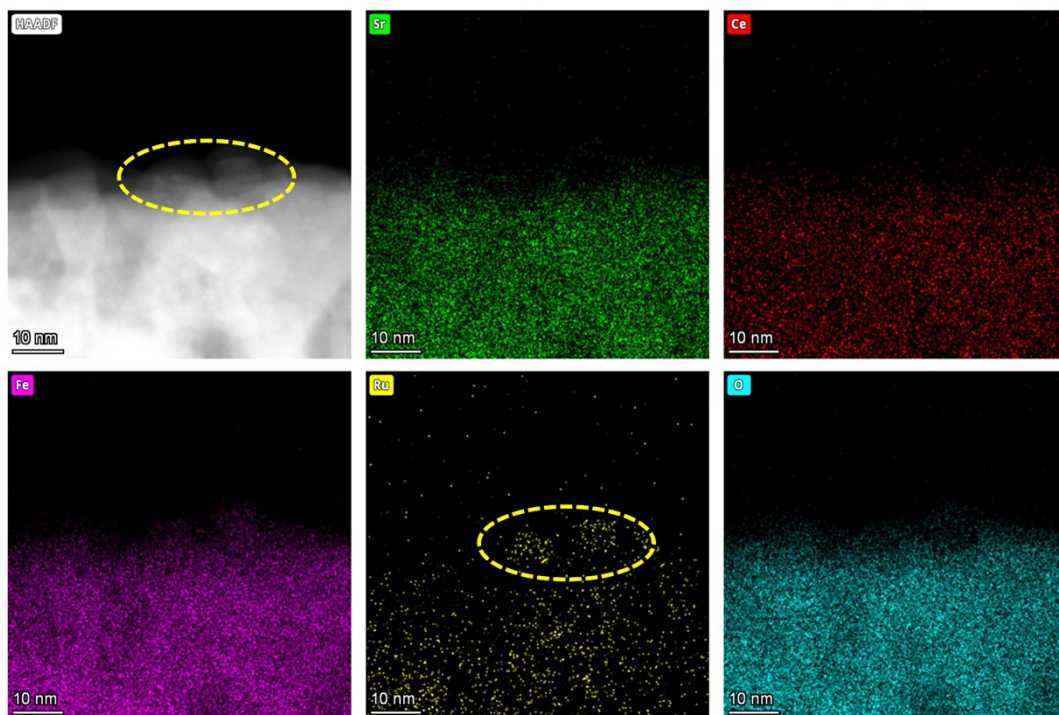

**Figure S4.** HAADF image and EDS mapping of SCFR-Ru nanofibers, confirming the exsolution of Ru nanoparticles.

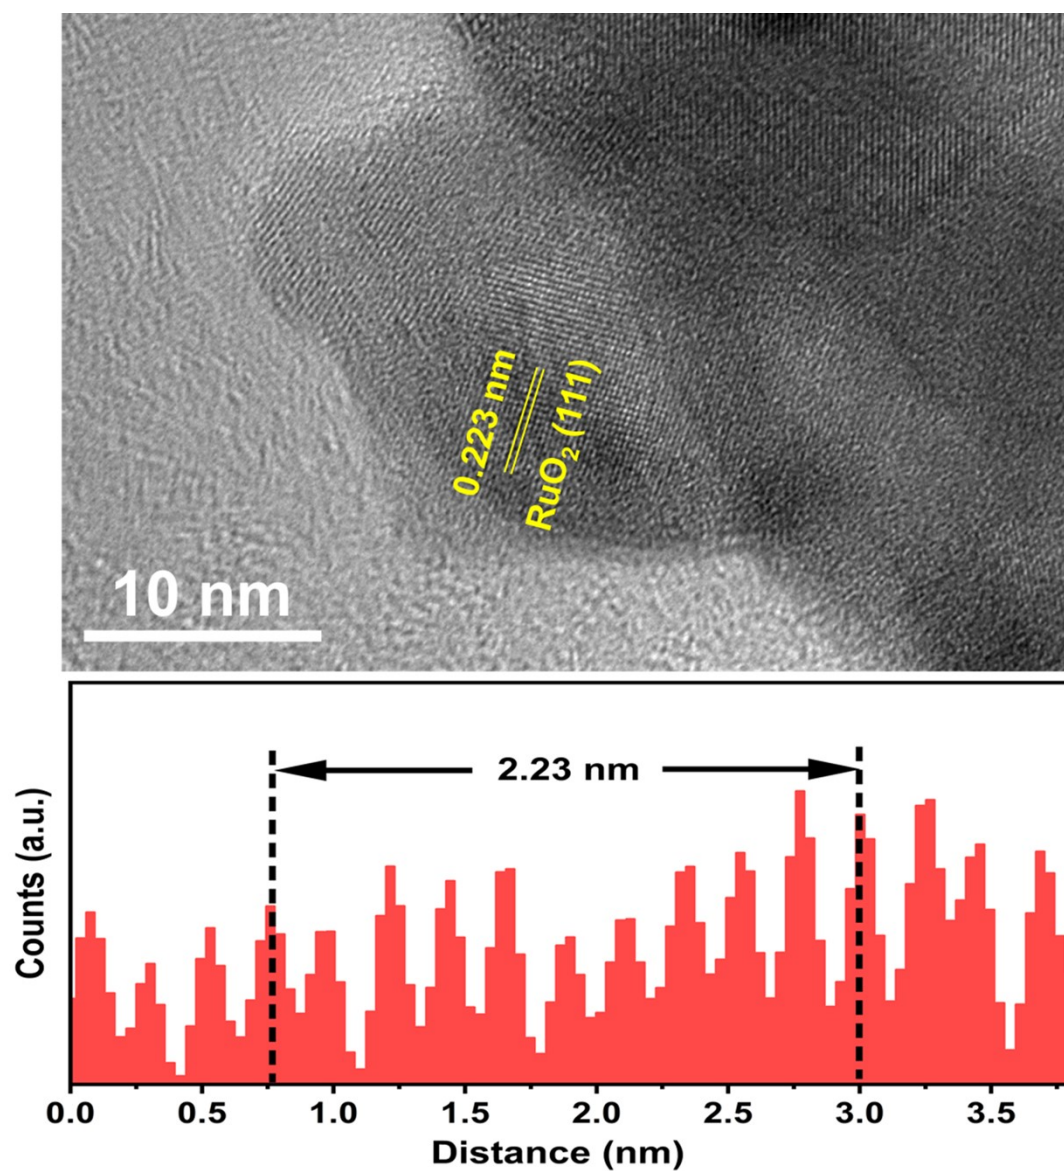

Figure S5. HAADF image and corresponding intensity profile of SCFR-RuO<sub>2</sub>.

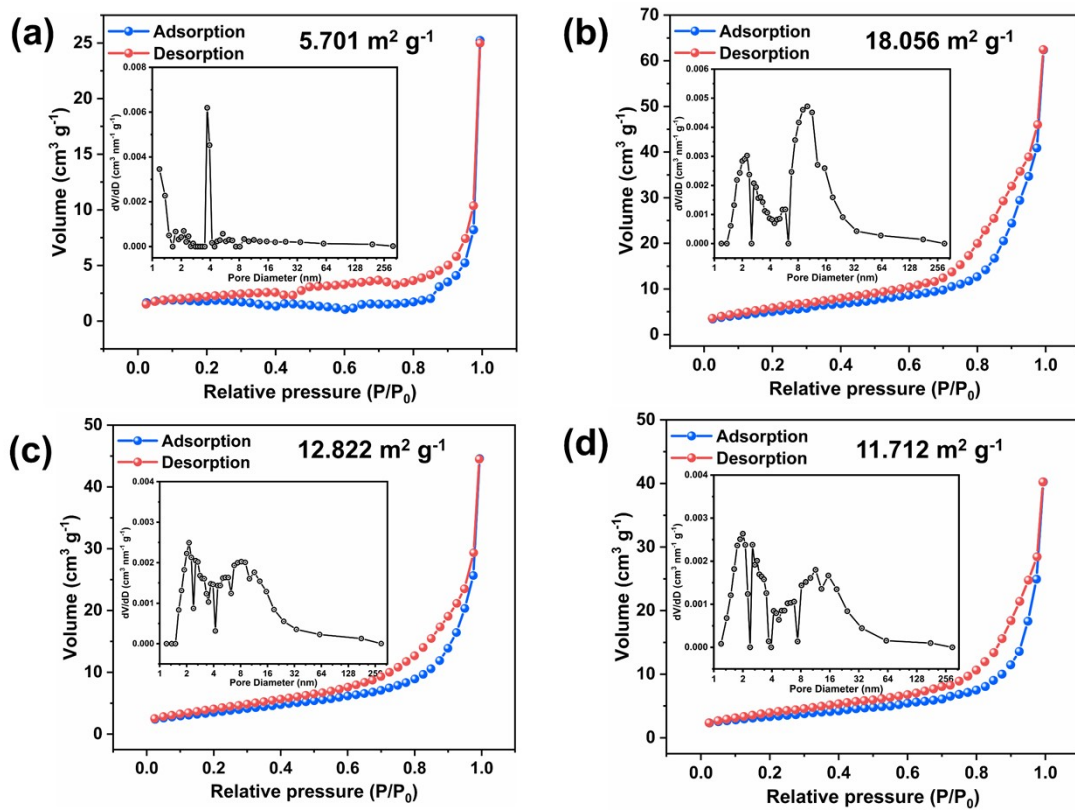

**Figure S6.** Nitrogen adsorption/desorption isotherms of (a) SCF, (b) SCFR, (c) SCFR-Ru and (d) SCFR-RuO<sub>2</sub>. Insets are the corresponding pore size distribution curves.

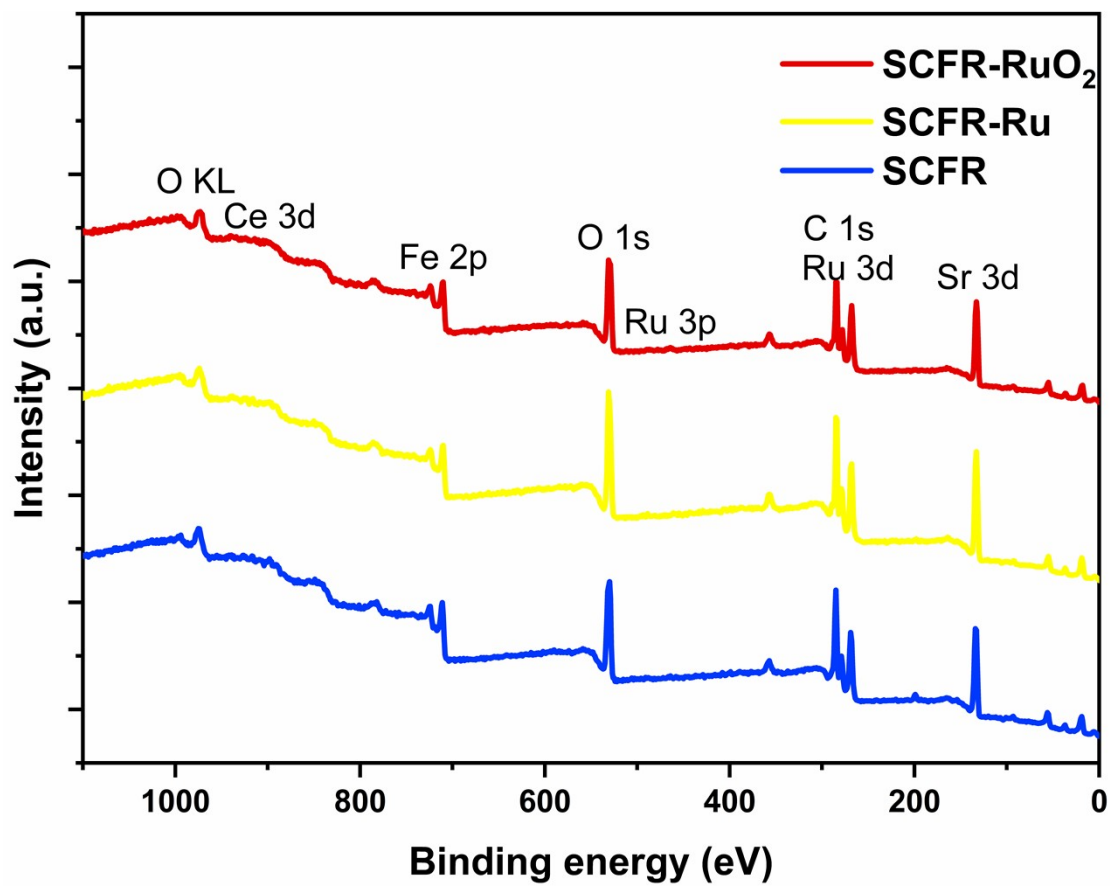

Figure S7. XPS survey spectra of SCFR, SCFR-Ru and SCFR-RuO<sub>2</sub>.



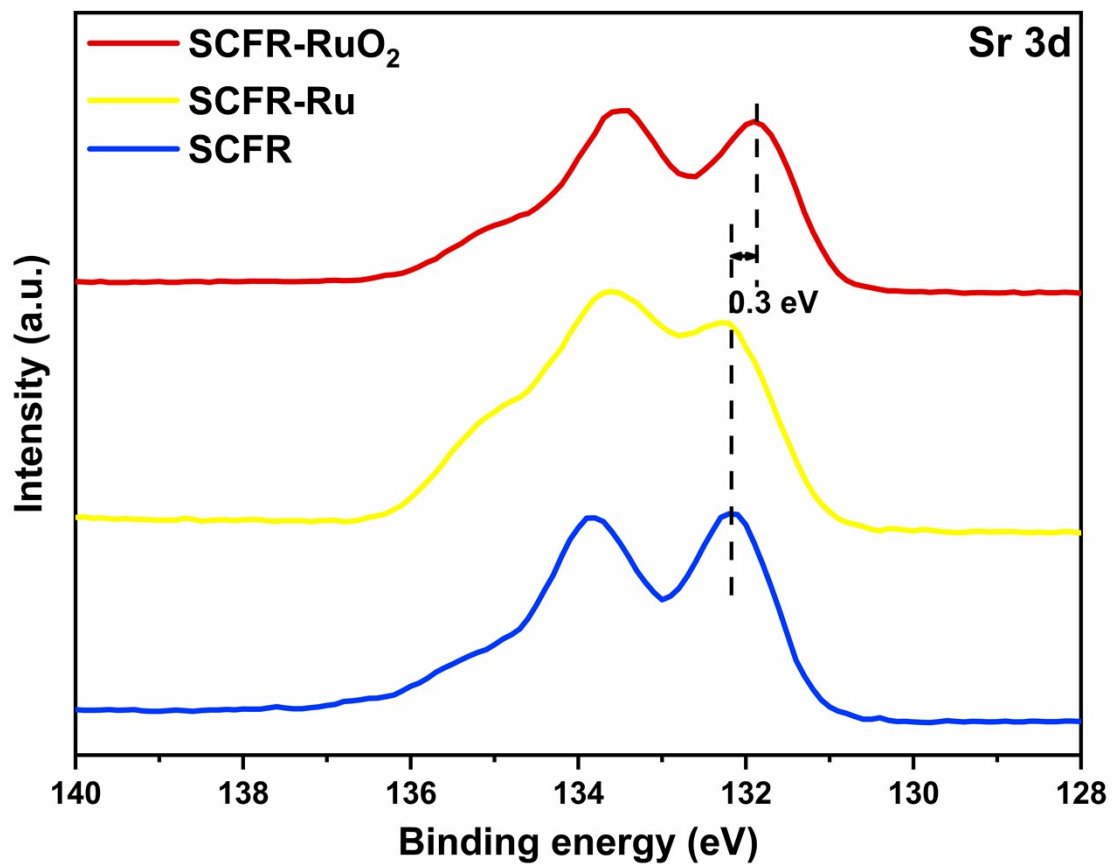

Figure S8. Sr 3d spectra of SCFR, SCFR-Ru and SCFR-RuO<sub>2</sub>.

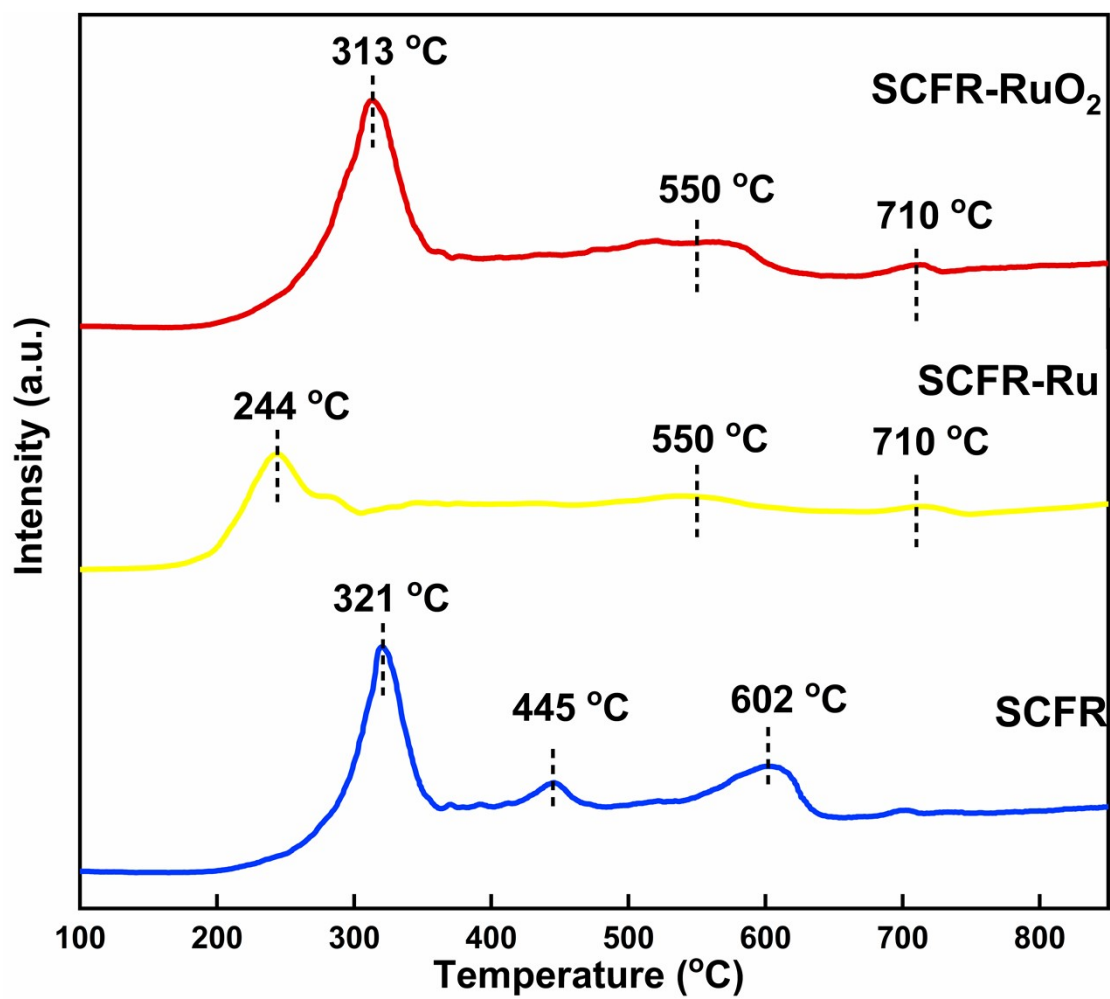

Figure S9. H<sub>2</sub>-TPR spectra of SCFR, SCFR-Ru, and SCFR-RuO<sub>2</sub>.

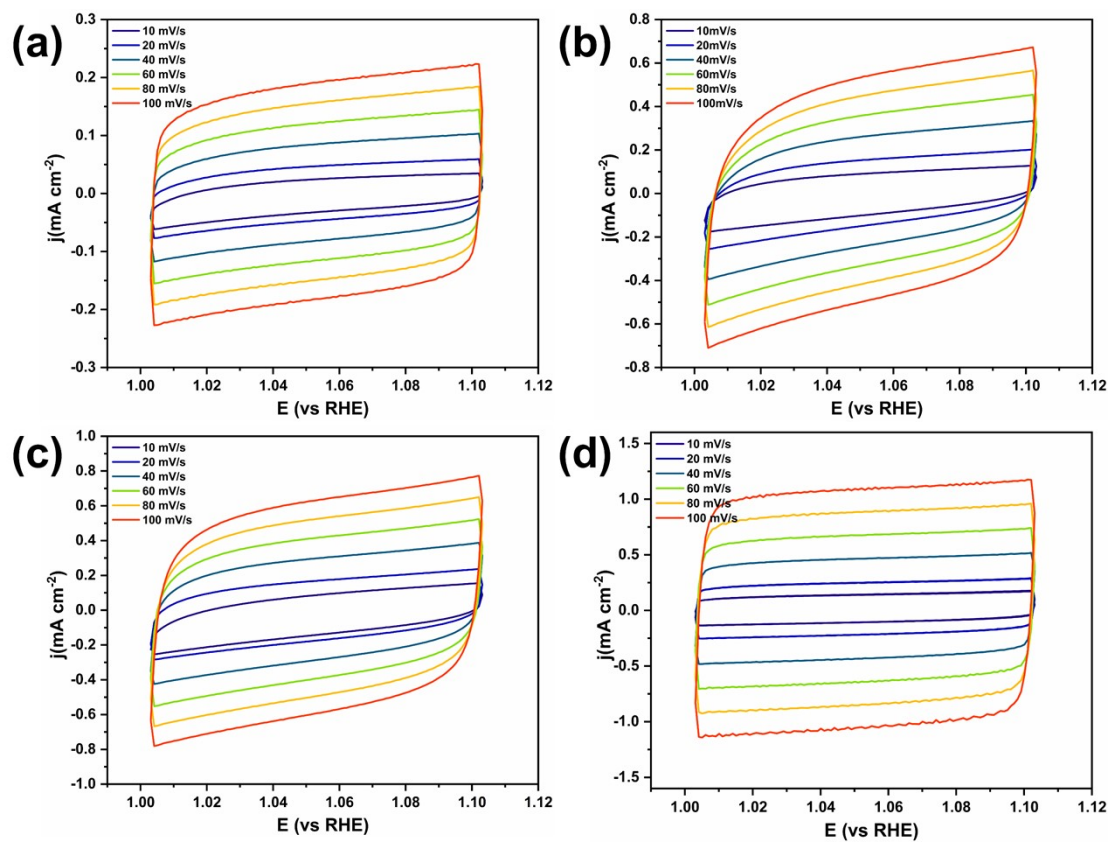

**Figure S10.** CV curves at different scan rates of (a) SCF, (b) SCFR, (c) SCFR-Ru, and (d) SCFR-RuO<sub>2</sub>.

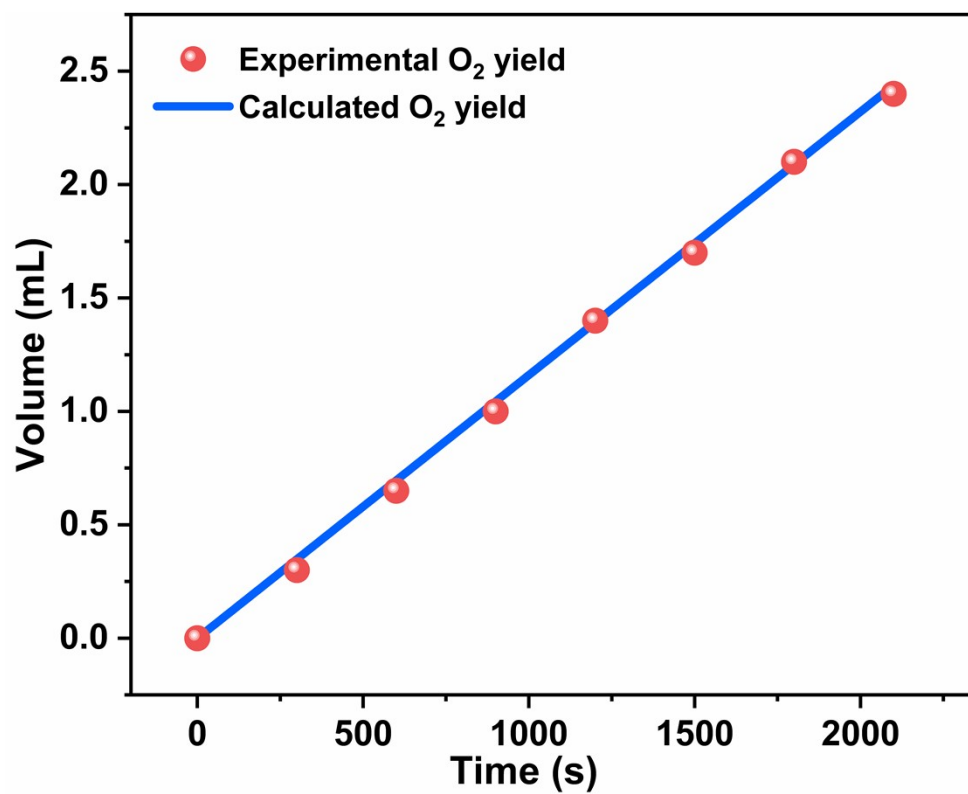

**Figure S11.** Faradic efficiency of SCFR-RuO<sub>2</sub> for OER at a constant current density of 80 mA cm<sup>-2</sup>.

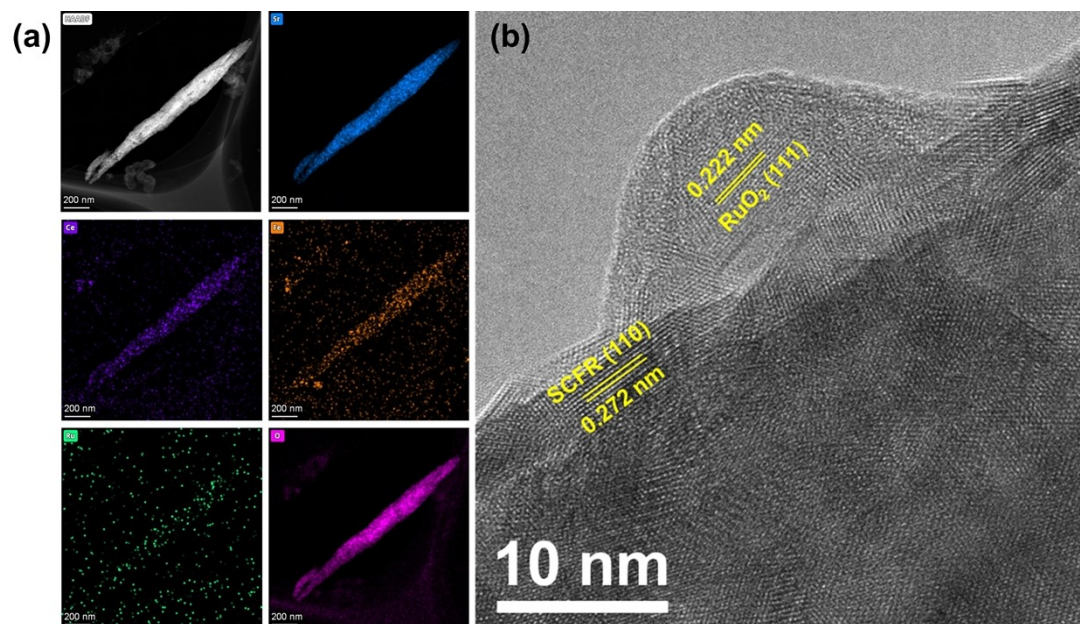

**Figure S12.** (a) EDS mapping and HRTEM image (b) of SCFR-RuO<sub>2</sub> nanofibers after stability test.

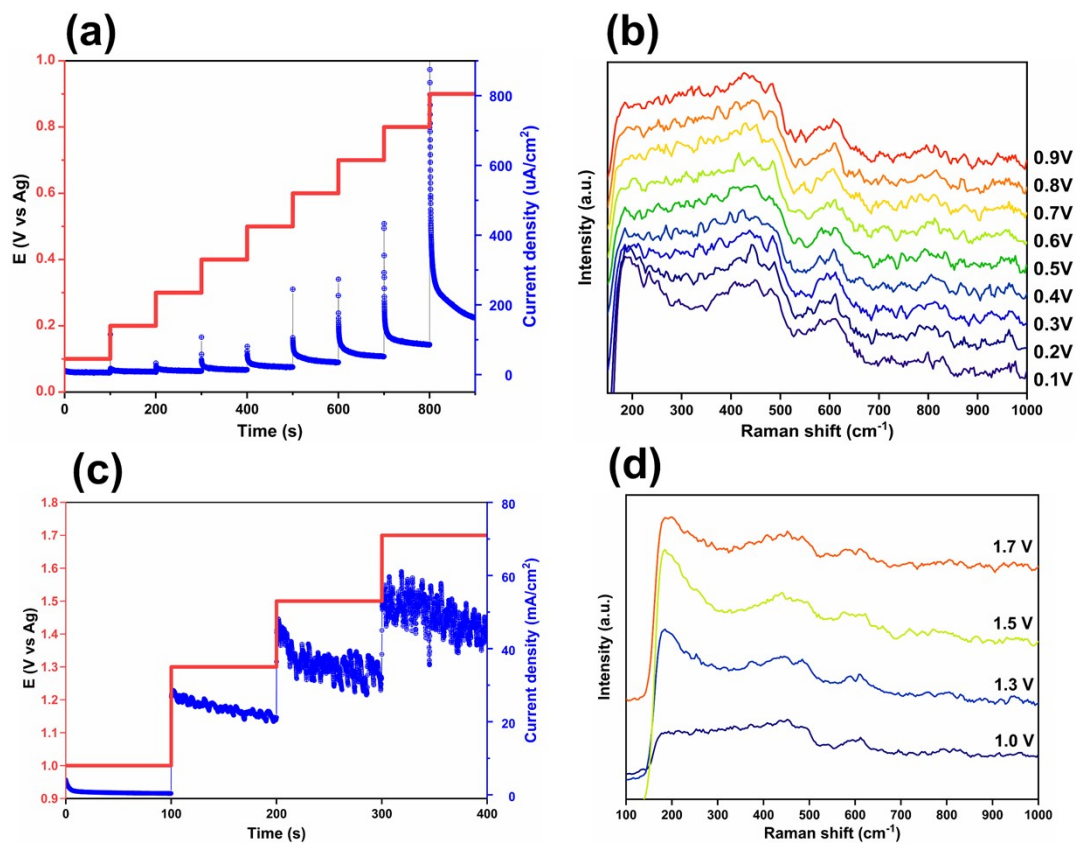

**Figure S13.** *In-situ* Raman characterizations. (a, c) Multipulsed amperometric curves of SCFR-RuO<sub>2</sub> under different potential of (a) 0.1 V – 0.9 V and (b) 1.0 V – 1.7 V. (b, d) *In-situ* Raman shift of SCFR- RuO<sub>2</sub> under different potential of (b) 0.1 V – 0.9 V and (d) 1.0 V – 1.7 V.

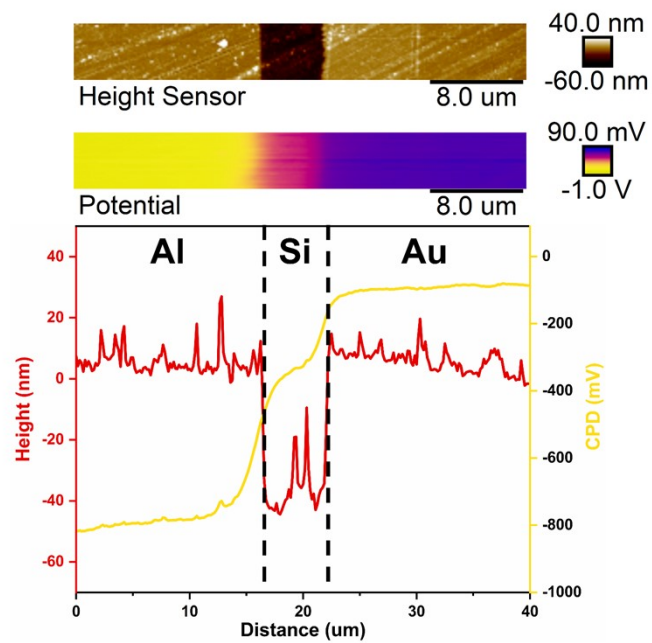

**Figure S14.** Topography and Potential images and corresponding profiles of Al-Si-Au sample.

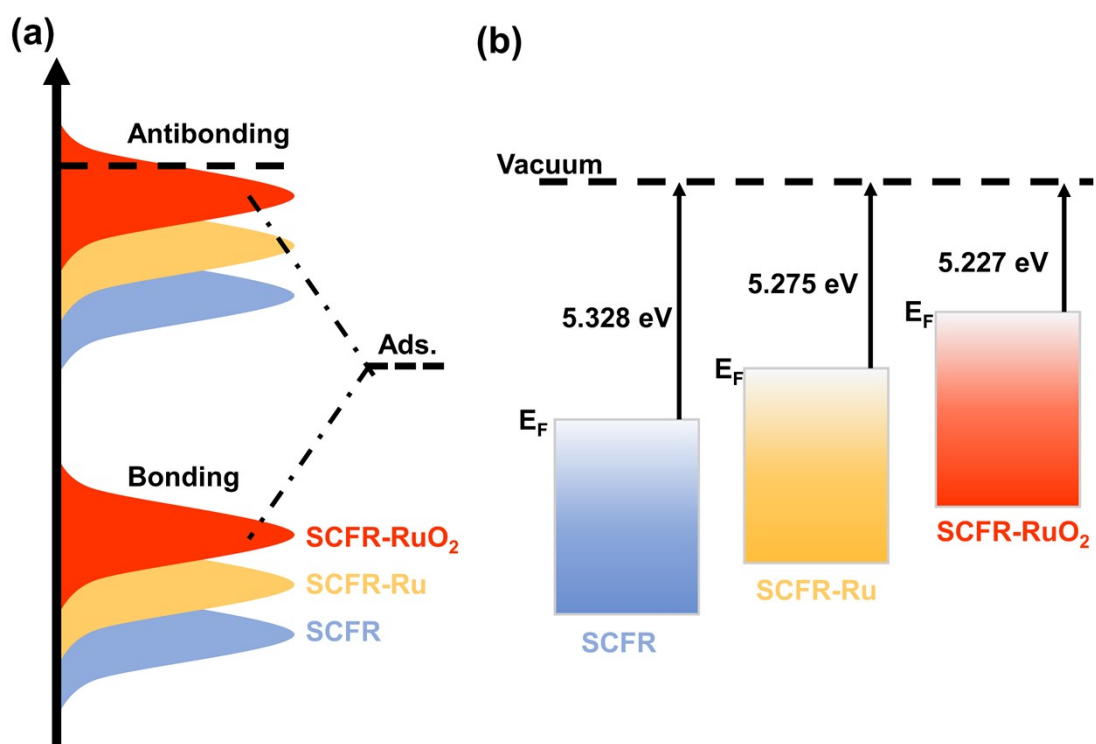

**Figure S15.** Schematic illustration of (a) bond formation between the catalyst surface and the adsorbates (Ads.), and (b) work functions.



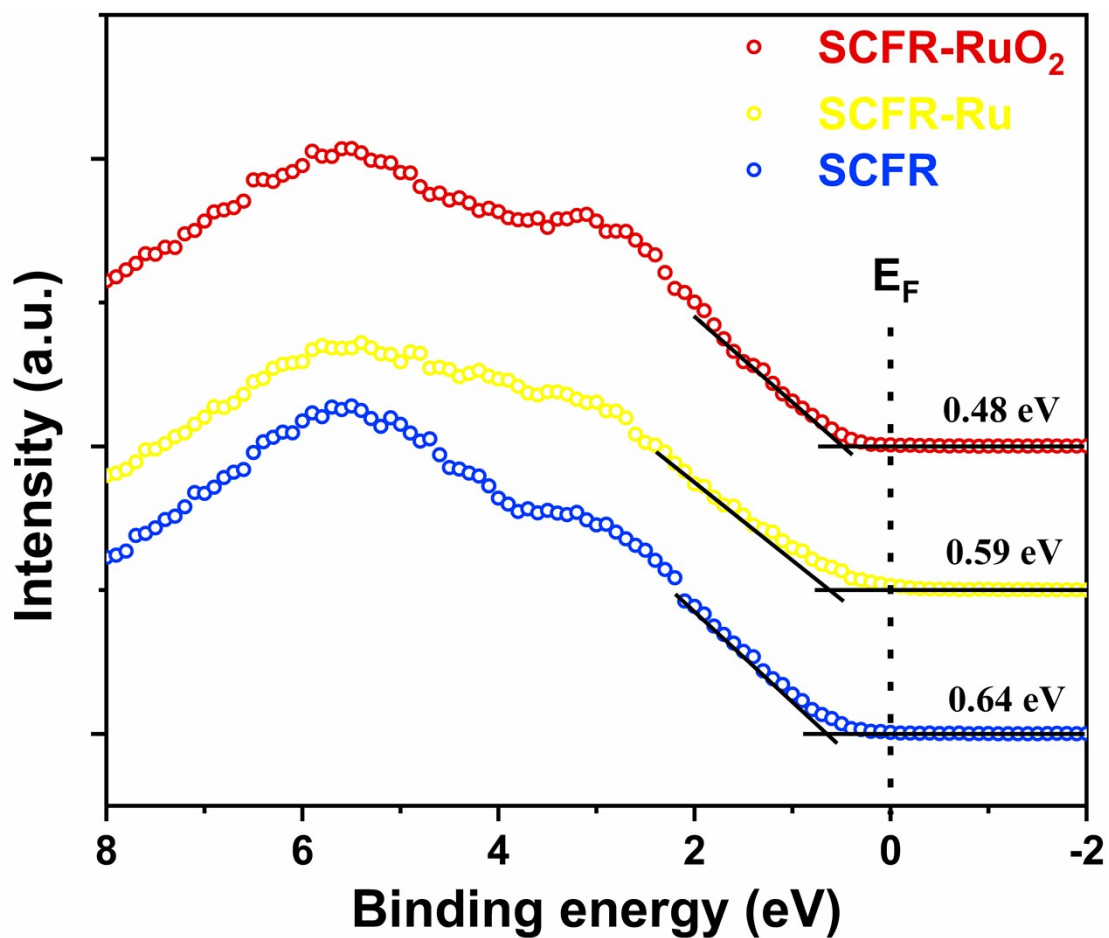

**Figure S16.** Enlarged view of the VB spectra of SCFR, SCFR-Ru, and SCFR-RuO<sub>2</sub>, showing a gradual shift of the VB maximum (VBM) towards the Fermi level ( $E_F$ ). The VBM is determined by linear extrapolation of the leading edge of the VBM to zero baseline intensity.

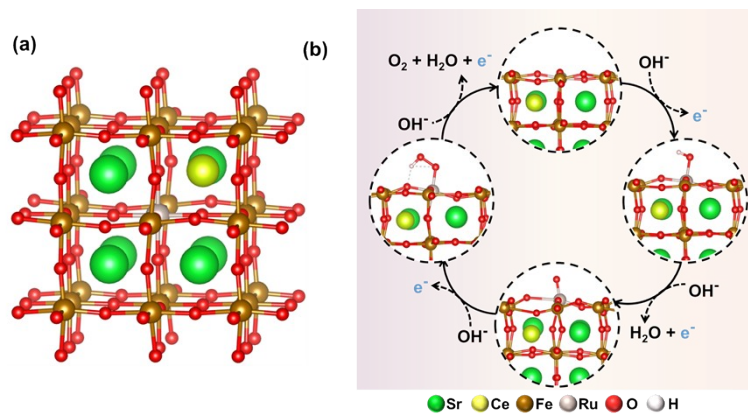

**Figure S17.** (a) Theoretical model of bulk  $\text{Sr}_7\text{Ce}_1\text{Fe}_7\text{Ru}_1\text{O}_{24}$ . (b) Proposed four-electron mechanism diagram toward OER in the absence of  $\text{RuO}_2$ .

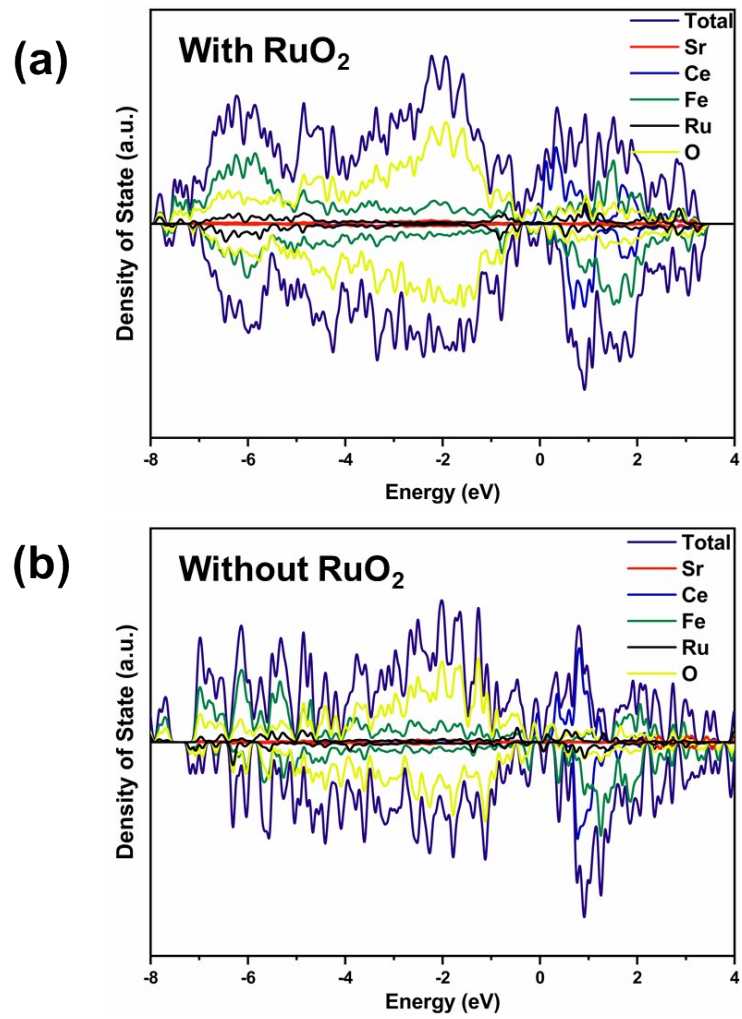

**Figure S18.** Calculated DOS plots in presence (a) and absence (b) of *in-situ* grown RuO<sub>2</sub>.

**Table S1.** XRD refined parameters of the samples.

| <b>Samples</b> | <b>Space group</b> | <b>R<sub>wp</sub> (%)</b> | <b>R<sub>p</sub> (%)</b> | <b>Cell parameter<br/>(Å)</b> | <b>Cell volume<br/>(Å<sup>3</sup>)</b> |
|----------------|--------------------|---------------------------|--------------------------|-------------------------------|----------------------------------------|
| <b>SCF</b>     | Pm-3m              | 4.416                     | 3.452                    | a=b=c=3.9373                  | 61.0373                                |
| <b>SCFR</b>    | Pm-3m              | 5.046                     | 4.048                    | a=b=c=3.9478                  | 61.5270                                |

**Table S2.** Specific areas and pore sizes of the samples

| <b>Samples</b>              | <b>Specific areas<br/>(m<sup>2</sup> g<sup>-1</sup>)</b> | <b>Pore sizes<br/>(nm)</b> |
|-----------------------------|----------------------------------------------------------|----------------------------|
| <b>SCF</b>                  | 5.701                                                    | 3.71                       |
| <b>SCFR</b>                 | 18.056                                                   | 10.05                      |
| <b>SCFR-Ru</b>              | 12.822                                                   | 2.13                       |
| <b>SCFR-RuO<sub>2</sub></b> | 11.712                                                   | 2.00                       |

**Table S3.** XPS peaks deconvolution results.

| <b>Samples</b>              | <b>Ce 3d (%)</b> |                  | <b>Fe 3p (%)</b> |                  |                  | <b>O 1s (%)</b>  |                  |                  |
|-----------------------------|------------------|------------------|------------------|------------------|------------------|------------------|------------------|------------------|
|                             | Ce <sup>3+</sup> | Ce <sup>4+</sup> | Fe <sup>2+</sup> | Fe <sup>3+</sup> | Fe <sup>4+</sup> | O <sub>lat</sub> | O <sub>ads</sub> | O <sub>H2O</sub> |
| <b>SCFR</b>                 | 13.33            | 86.67            | 16.51            | 63.76            | 19.73            | 39.55            | 56.19            | 4.26             |
| <b>SCFR-Ru</b>              | 28.30            | 71.70            | 30.08            | 56.78            | 13.14            | 36.00            | 62.56            | 1.44             |
| <b>SCFR-RuO<sub>2</sub></b> | 17.07            | 82.98            | 24.74            | 52.23            | 23.03            | 42.05            | 56.82            | 1.13             |

**Table S4.** Comparison of the electrochemical performance of SCFR-H-O with some previously reported catalysts for OER<sup>1-18</sup>.

| <b>Catalysts</b>                                                                           | <b>Overpotential<br/>at 10 mA cm<sup>-2</sup><br/>(mV)</b> | <b>Tafel slope<br/>(mV dec<sup>-1</sup>)</b> | <b>Catalyst<br/>loading<br/>(mg cm<sup>-2</sup>)</b> | <b>Ref</b> |
|--------------------------------------------------------------------------------------------|------------------------------------------------------------|----------------------------------------------|------------------------------------------------------|------------|
| SCFR-RuO <sub>2</sub>                                                                      | 295                                                        | 77                                           | 0.204                                                | This work  |
| Pt/C                                                                                       | 465                                                        | NA                                           | 0.209                                                | 1          |
| IrO <sub>2</sub>                                                                           | 340                                                        | 53.8                                         | 0.209                                                | 2          |
| RuO <sub>2</sub> /C                                                                        | 390                                                        | NA                                           | 0.14                                                 | 3          |
| Sr <sub>x</sub> Co <sub>0.8</sub> Fe <sub>0.2</sub> O <sub>3</sub>                         | 400                                                        | 49                                           | 0.3                                                  | 4          |
| SrCo <sub>0.8</sub> Fe <sub>0.5-x</sub> O <sub>3-δ</sub> /Fe <sub>x</sub> O <sub>y</sub>   | 352                                                        | 79                                           | 0.243                                                | 5          |
| SrCo <sub>0.8</sub> Fe <sub>0.2</sub> O <sub>3</sub>                                       | 530                                                        | NA                                           | 0.232                                                | 6          |
| Sr <sub>2</sub> Fe <sub>2</sub> O <sub>6-δ</sub>                                           | 480                                                        | 60                                           | NA                                                   | 7          |
| SrFeO <sub>3</sub>                                                                         | 500                                                        | 75                                           | 0.232                                                | 8          |
| CaFeO <sub>3</sub>                                                                         | 520                                                        | 82                                           | 0.022                                                | 9          |
| BaFeO <sub>3</sub>                                                                         | 493                                                        | NA                                           | NA                                                   | 10         |
| LaFeO <sub>3</sub>                                                                         | 466                                                        | 90                                           | 0.407                                                | 11         |
| 3DOM-LaFeO <sub>3</sub>                                                                    | 420                                                        | 62                                           | 0.232                                                | 12         |
| La <sub>1-x</sub> Sr <sub>x</sub> Co <sub>1-y</sub> Fe <sub>y</sub> O <sub>3-δ</sub>       | 440                                                        | 109                                          | 0.2                                                  | 13         |
| La <sub>1.5</sub> Sr <sub>0.5</sub> NiMn <sub>0.5</sub> Ru <sub>0.5</sub> O <sub>6</sub>   | 430                                                        | NA                                           | 0.05                                                 | 14         |
| Ba <sub>0.5</sub> Sr <sub>0.5</sub> Co <sub>0.8</sub> Fe <sub>0.2</sub> O <sub>3-δ</sub>   | 500                                                        | 65                                           | 0.232                                                | 15         |
| La <sub>0.2</sub> Sr <sub>0.8</sub> FeO <sub>3-δ</sub>                                     | 370                                                        | 60                                           | 0.232                                                | 8          |
| SrFe <sub>0.9</sub> Ti <sub>0.1</sub> O <sub>3</sub>                                       | 520                                                        | 102                                          | 0.32                                                 | 16         |
| 80nm LaCoO <sub>3</sub>                                                                    | 490                                                        | 69                                           | 0.25                                                 | 17         |
| Bulk LaFe <sub>0.8</sub> Co <sub>0.2</sub> O <sub>3</sub>                                  | 460                                                        | 70                                           | 0.232                                                | 12         |
| SrNb <sub>0.1</sub> Co <sub>0.7</sub> Fe <sub>0.2</sub> O <sub>3-δ</sub>                   | 500                                                        | 76                                           | 0.232                                                | 6          |
| PrBa <sub>0.5</sub> Sr <sub>0.5</sub> Co <sub>1.5</sub> Fe <sub>0.5</sub> O <sub>5+δ</sub> | 358                                                        | 52                                           | 0.202                                                | 18         |

## References

1. N. -I. Kim, Y. J. Sa, T. S. Yoo, S. R. Choi, R. A. Afzal, T. Choi, Y. -S. Seo, K. -S. Lee, J. Y. Hwang, W. S. Choi, S. H. Joo, J. -Y. Park, *Sci. Adv.*, 2018, **4**, eaap9360.
2. R. Zhang, Y.-C. Zhang, L. Pan, G.-Q. Shen, N. Mahmood, Y.-H. Ma, Y. Shi, W. Jia, L. Wang, X. Zhang, W. Xu and J.-J. Zou, *Acs. Catal.*, 2018, **8**, 3803-3811.
3. Y. Zhan, C. Xu, M. Lu, Z. Liu and J. Y. Lee, *J. Mater. Chem. A*, 2014, **2**, 16217-16223.
4. Y. Da, L. Zeng, C. Wang, C. Gong and L. Cui, *Electrochim. Acta*, 2019, **300**, 85-92.
5. Y. Yi, Q. Wu, J. Li, W. Yao and C. Cui, *ACS Appl. Mater. Interfaces*, 2021, **13**, 17439-17449.
6. Y. Zhu, W. Zhou, Z. G. Chen, Y. Chen, C. Su, M. O. Tade and Z. Shao, *Angew. Chem. Int. Ed. Engl.*, 2015, **54**, 3897-3901.
7. R. K. Hona and F. Ramezanipour, *Angew. Chem. Int. Ed. Engl.*, 2019, **58**, 2060-2063.
8. S. She, J. Yu, W. Tang, Y. Zhu, Y. Chen, J. Sunarso, W. Zhou and Z. Shao, *ACS Appl. Mater. Interfaces*, 2018, **10**, 11715-11721.
9. R. Sankannavar and A. Sarkar, *Int. J. Hydrogen Energy*, 2018, **43**, 4682-4690.
10. K. Zhu, H. Liu, X. Li, Q. Li, J. Wang, X. Zhu and W. Yang, *Electrochim. Acta*, 2017, **241**, 433-439.
11. H. Wang, J. Wang, Y. Pi, Q. Shao, Y. Tan and X. Huang, *Angew. Chem. Int. Ed. Engl.*, 2019, **58**, 2316-2320.
12. J. Dai, Y. Zhu, Y. Zhong, J. Miao, B. Lin, W. Zhou and Z. Shao, *Adv. Mater. Interfaces*, 2018, **6**, 1801317.
13. R. Majee, S. Chakraborty, H. G. Salunke and S. Bhattacharyya, *ACS Appl. Energy Mater.*, 2018, **1**, 3342-3350.
14. M. Retuerto, F. Calle-Vallejo, L. Pascual, G. Lumbeeck, M. T. Fernandez-Diaz, M. Croft, J. Gopalakrishnan, M. A. Pena, J. Hadermann, M. Greenblatt and S. Rojas, *ACS Appl. Mater. Interfaces*, 2019, **11**, 21454-21464.
15. W. Z. Gao Chen, Daqin Guan, Jaka Sunarso, Yanping Zhu, Xuefeng Hu, Wei Zhang, Zongping Shao, *Sci. Adv.*, 2017, **3**, e1603206.
16. C. Su, W. Wang, Y. Chen, G. Yang, X. Xu, M. O. Tade and Z. Shao, *ACS Appl. Mater. Interfaces*, 2015, **7**, 17663-17670.
17. S. Zhou, X. Miao, X. Zhao, C. Ma, Y. Qiu, Z. Hu, J. Zhao, L. Shi and J. Zeng, *Nat. Commun.*, 2016, **7**, 11510.
18. B. Zhao, L. Zhang, D. Zhen, S. Yoo, Y. Ding, D. Chen, Y. Chen, Q. Zhang, B. Doyle, X. Xiong and M. Liu, *Nat. Commun.*, 2017, **8**, 14586.
